# Supplementary material for: Family impact and economic burden among caregivers of children with chronic kidney disease in Assiut, Egypt
Source: PubMed Central journal article supplement (PMC7539246; doi:10.1186/s42506-020-00058-7), 2020-10-07
Supplement: 42506_2020_58_MOESM3_ESM.pdf [file 42506_2020_58_MOESM3_ESM.pdf]

## PedsQL™ 2.0 Family Impact Module

The Parent report of the [PedsQL™ 2.0 Family impact Module](#) is composed of 36 items comprising 8 dimensions.

### DESCRIPTION OF THE FAMILY IMPACT MODULE:

| Dimensions            | Number of Items | Cluster of Items | Reversed Scoring | Direction of Dimensions                    |
|-----------------------|-----------------|------------------|------------------|--------------------------------------------|
| Physical Functioning  | 6               | 1-6              | 1-6              | Higher scores indicate better functioning. |
| Emotional Functioning | 5               | 1-5              | 1-5              |                                            |
| Social Functioning    | 4               | 1-4              | 1-4              |                                            |
| Cognitive Functioning | 5               | 1-5              | 1-5              |                                            |
| Communication         | 3               | 1-3              | 1-3              |                                            |
| Worry                 | 5               | 1-5              | 1-5              |                                            |
| Daily Activities      | 3               | 1-3              | 1-3              |                                            |
| Family Relationships  | 5               | 1-5              | 1-5              |                                            |

### SCORING OF DIMENSIONS:

|                                       |                                                                                                                                                                                                                                                                                                                                                                                                                                                                                                                                                                                                                                                                                                                               |
|---------------------------------------|-------------------------------------------------------------------------------------------------------------------------------------------------------------------------------------------------------------------------------------------------------------------------------------------------------------------------------------------------------------------------------------------------------------------------------------------------------------------------------------------------------------------------------------------------------------------------------------------------------------------------------------------------------------------------------------------------------------------------------|
| <b>Item Scaling</b>                   | 5-point Likert scale from 0 (Never) to 4 (Almost always)                                                                                                                                                                                                                                                                                                                                                                                                                                                                                                                                                                                                                                                                      |
| <b>Weighting of Items</b>             | No                                                                                                                                                                                                                                                                                                                                                                                                                                                                                                                                                                                                                                                                                                                            |
| <b>Extension of the Scoring Scale</b> | Scores are transformed to a 0 to 100 scale.                                                                                                                                                                                                                                                                                                                                                                                                                                                                                                                                                                                                                                                                                   |
| <b>Scoring Procedure</b>              | <p><b>Step 1: Transform Score</b><br/>Items are reversed scored and linearly transformed to a 0-100 scale as follows: 0=100, 1=75, 2=50, 3=25, 4=0</p> <p><b>Step 2: Calculate Scores by Dimensions</b></p> <ul style="list-style-type: none"> <li>• If more than 50% of the items in the scale are missing, the scale scores should not be computed,</li> <li>• Mean score = Sum of the items over the number of items answered.</li> </ul> <p><b>Step 3: Total Scores</b></p> <ul style="list-style-type: none"> <li>• The Total Score is the sum of all 36 items divided by the number of items answered</li> <li>• The Parent HRQL Summary Score (20 items) is computed as the sum of the items divided by the</li> </ul> |

|  |                                                                                                                                                                                                                                                                                                                                               |
|--|-----------------------------------------------------------------------------------------------------------------------------------------------------------------------------------------------------------------------------------------------------------------------------------------------------------------------------------------------|
|  | <p>number of items answered in the Physical, Emotional, Social, and Cognitive Functioning scales.</p> <ul style="list-style-type: none"> <li>• The Family Functioning Summary Score (8 items) is computed as the sum of the items divided by the number of items answered in the Daily Activities and family Relationships scales.</li> </ul> |
|--|-----------------------------------------------------------------------------------------------------------------------------------------------------------------------------------------------------------------------------------------------------------------------------------------------------------------------------------------------|

PedsQL TM 2.0 Family Impact Module

|                                                           |                                                                                                                                                                                                |
|-----------------------------------------------------------|------------------------------------------------------------------------------------------------------------------------------------------------------------------------------------------------|
| <p><b>Interpretation and Analysis of Missing Data</b></p> | <p>If more than 50% of the items in the scale are missing, the Scale Scores should not be computed. If 50% or more items are completed: Impute the mean of the completed items in a scale.</p> |
|-----------------------------------------------------------|------------------------------------------------------------------------------------------------------------------------------------------------------------------------------------------------|
